# Supplementary material
Source: Springer Nature journal article supplement (http://www.springermedizin.de/resource/supplementary/13075_2011_3469_MOESM1_ESM.pdf/9694650)

**A**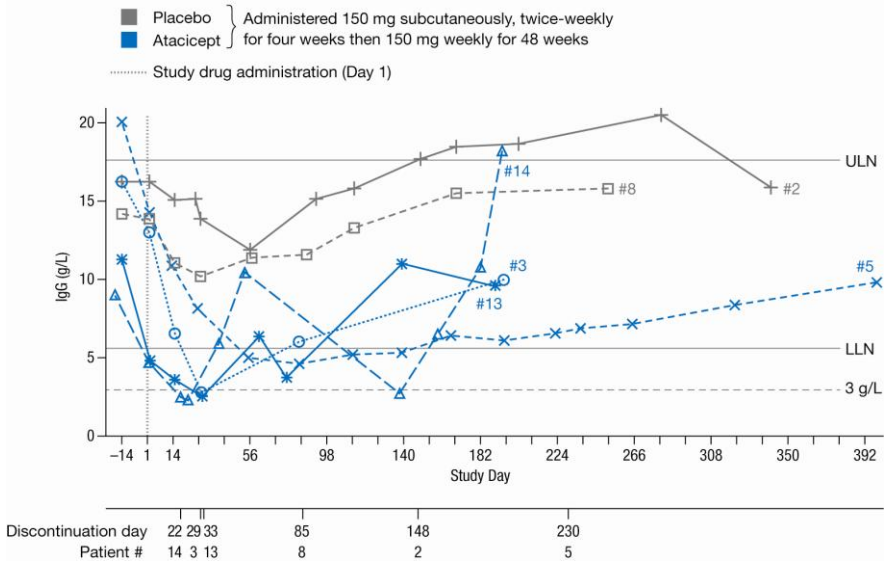**B**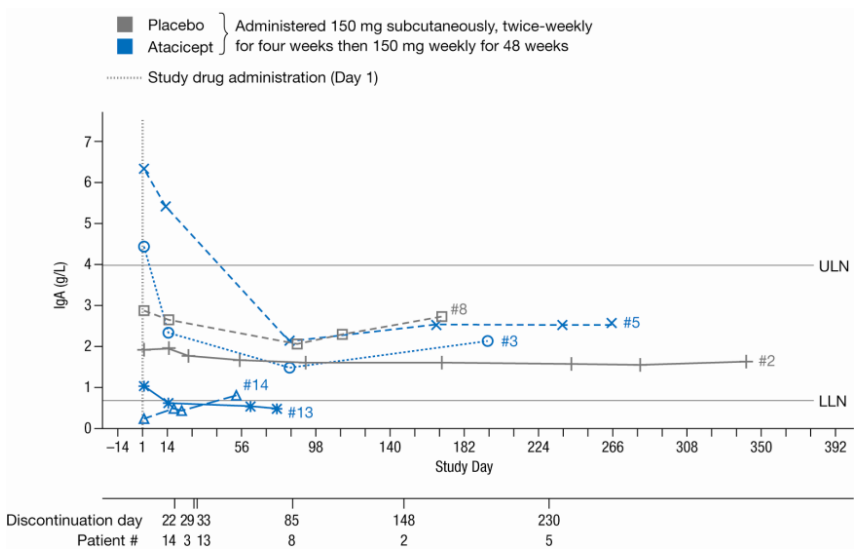**C**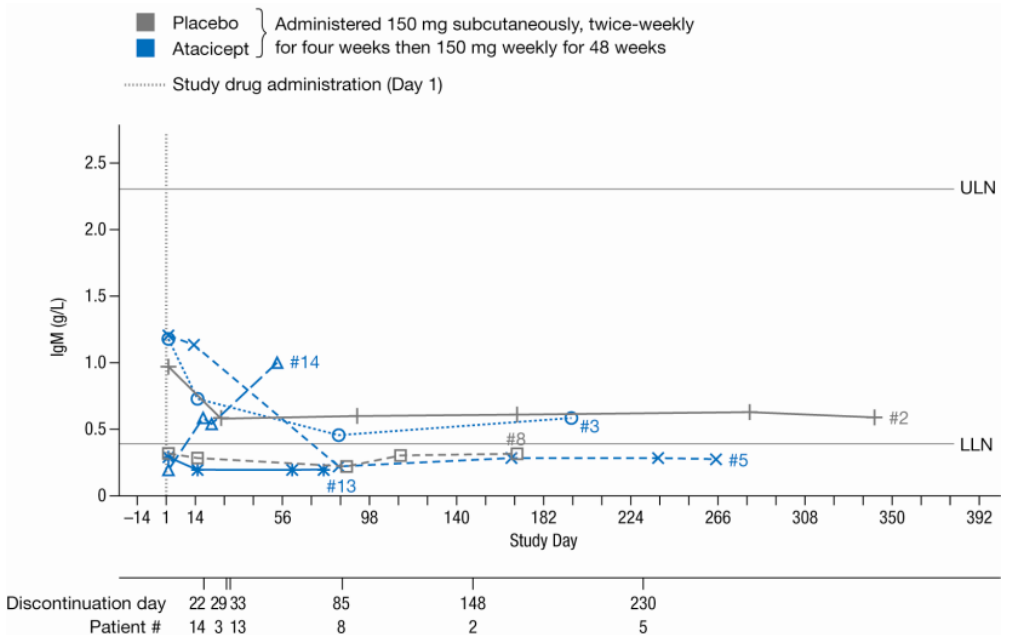

Supplement: MOESM1 [file 9694650]
